# Supplementary material for: Healthcare Costs for Acute Hospitalized and Chronic Heart Failure in South Korea: A Multi-Center Retrospective Cohort Study
Source: PubMed Central journal article supplement — Yonsei Med J. 2017 Jul 31;58(5):944–53. doi: 10.3349/ymj.2017.58.5.944 (PMC5552648; doi:10.3349/ymj.2017.58.5.944), 2017-07-31
Supplement: ymj-58-944-s001.pdf [file ymj-58-944-s001.pdf]

**Supplementary Table 1.** Annual Health Care Costs By Cost Domains

| <b>Variables</b>           | <b>Hospitalized patients<br/>(group A, n=111)</b> | <b>Non-hospitalized patients<br/>(group B, n=389)</b> | <b>Total<br/>(n=500)</b> |
|----------------------------|---------------------------------------------------|-------------------------------------------------------|--------------------------|
| Cost domains, PPPY (%)     |                                                   |                                                       |                          |
| Physician visits           | 157,048 (2.0)                                     | 81,348 (24.8)                                         | 98,154 (4.8)             |
| Inpatient care             | 1,316,418 (16.4)                                  | 88 (0.0)                                              | 292,313 (14.3)           |
| Emergency management       | 12,892 (0.2)                                      | -                                                     | 2,862 (0.1)              |
| Meals                      | 157,519 (2.0)                                     | -                                                     | 34,969 (1.7)             |
| Dispensing                 | 307,278 (3.8)                                     | 51,954 (15.8)                                         | 108,636 (5.3)            |
| Injection and transfusion  | 385,683 (4.8)                                     | 2,678 (0.8)                                           | 87,705 (4.3)             |
| Anesthesia                 | 39,450 (0.5)                                      | 0 (0.0)                                               | 8,758 (0.4)              |
| Surgical procedures        | 1,094,126 (13.6)                                  | 814 (0.2)                                             | 243,529 (11.9)           |
| Tests                      | 1,693,772 (21.1)                                  | 124,669 (38.0)                                        | 473,010 (23.2)           |
| Diagnostic imaging         | 1,039,063 (12.9)                                  | 10,169 (3.1)                                          | 238,583 (11.7)           |
| Radiology and radiotherapy | 13,830 (0.2)                                      | -                                                     | 3,070 (0.2)              |
| Medical device             | 1,103,710 (13.7)                                  | 306 (0.1)                                             | 245,262 (12.0)           |
| Physiotherapy              | 27,979 (0.3)                                      | 255 (0.1)                                             | 6,410 (0.3)              |
| Psychotherapy              | 667 (0.0)                                         | -                                                     | 148 (0.0)                |
| Blood                      | 61,805 (0.8)                                      | -                                                     | 13,721 (0.7)             |
| CT                         | 82,489 (1.0)                                      | 2,651 (0.8)                                           | 20,375 (1.0)             |
| MRI                        | 143,477 (1.8)                                     | -                                                     | 31,852 (1.6)             |
| Ultrasonography            | 396,568 (4.9)                                     | 53,060 (16.2)                                         | 129,319 (6.3)            |
| Others                     | 5,287 (0.1)                                       | 514 (0.2)                                             | 1,573 (0.1)              |
| <b>Total</b>               | <b>8,039,060 (100.0)</b>                          | <b>328,506 (100.0)</b>                                | <b>2,040,249 (100.0)</b> |

PPPY, per-patient per-year (KRW 1,000).

US \$1=1,170 Korean won (2016).
